# Supplementary material
Source: PubMed Central journal article supplement (PMC4130794)

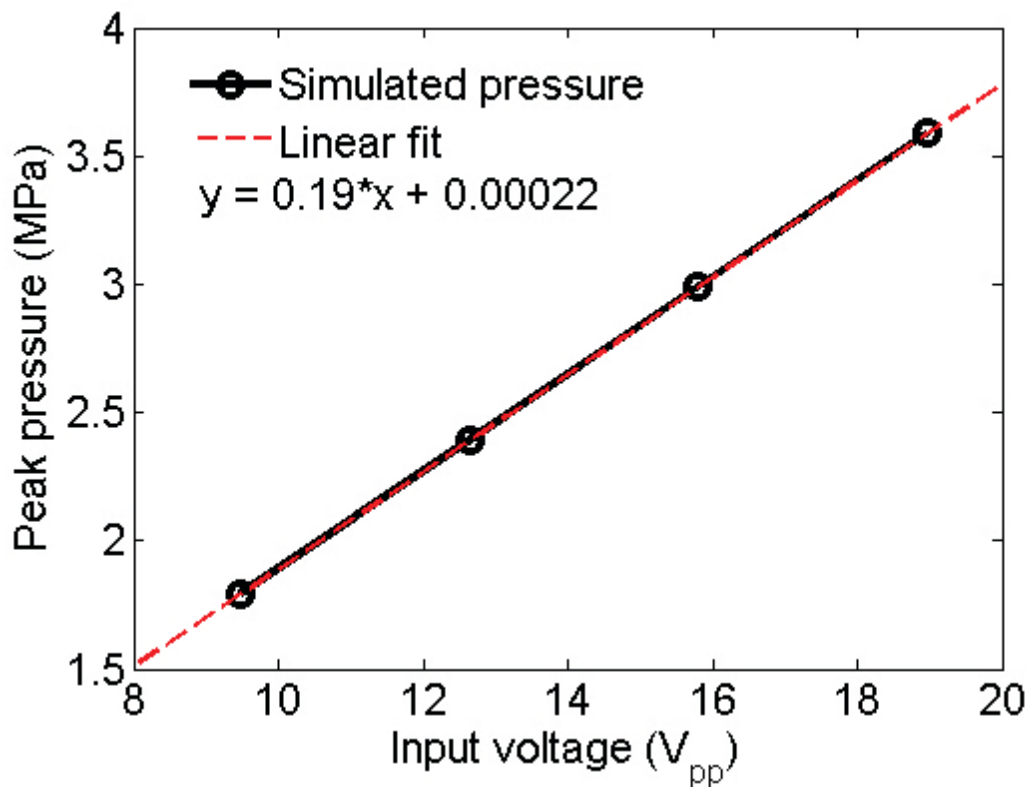

Supplement: NIHMS578301-supplement-03.pdf [file NIHMS578301-supplement-03.pdf]
